# Supplementary material for: Selective Assembly of TRPC Channels in the Rat Retina During Photoreceptor Degeneration
Source: Preprints.org preprint supplement (doi:10.20944/preprints202406.0211.v1), 2024-06-04
Supplement: Supplementary file 2 [file supplementary]

Archive with 1 entries (1 files):
- Fig. S1_ Supplementary Figure.pdf
